# Supplementary material
Source: HighWire-hosted journal article supplement (https://bmjopensem.bmj.com/content/4/1/e000430)
Supplement: inline-supplementary-material-2 [file inline-supplementary-material-2.docx]

**Supplementary Table 2. Risk of bias table: review authors' judgements about each risk of bias item presented for each included study**

| **Bias** | **Houck31** | **Jeong32** | **Kulig33** |
| --- | --- | --- | --- |
| Random sequence generation (selection bias) | Low | Unclear | Unclear |
| Allocation concealment (selection bias) | High | Unclear | Unclear |
| Blinding of participants and personnel (performance bias) | High | Unclear | Unclear |
| Blinding of outcome assessment (detection bias) | Unclear | Unclear | Low |
| Incomplete outcome data (attrition bias) | Low | High | Low |
| Selective reporting (reporting bias) | High | Unclear | High |
